# Supplementary material for: Effective electron transfer between heteropoly blue and graphene oxide: a green approach to graphene synthesis
Source: Royal Society of Chemistry journal article supplement (doi:10.1039/c4nj00241e), 2014-03-26
Supplement: c4nj00241e1.pdf [file c4nj00241e1.pdf]

# Effective Electron Transfer between Heteropoly Blue and Graphene Oxide: A Green Approach to Graphene Synthesis

Min Jiang<sup>a</sup>, Dandan Zhu<sup>a</sup>, Hongyu Zhang<sup>b\*</sup> and Xuebo Zhao<sup>a\*</sup>

<sup>a</sup>Energy Utilization Technology Center, Qingdao Institute of Bioenergy and Bioprocess Technology, Chinese Academy of Sciences, Qingdao, 266101, P. R. China. E-mail: [zhaobx@qibebt.ac.cn](mailto:zhaobx@qibebt.ac.cn)

<sup>b</sup>College of Chemistry and Chemical Engineering, Ocean University of China, Qingdao 266100, P. R. China. E-mail: [hongyuzhang@ouc.edu.cn](mailto:hongyuzhang@ouc.edu.cn)

## Preparation

### $K_{12.5}Na_{1.5}[NaP_5W_{30}O_{110}] (NaP_5W_{30})$ :

In a typical experiment, 33 g of  $Na_2WO_4 \cdot 2H_2O$  was dissolved in 30 mL of water and 26.5 mL of 85%  $H_3PO_4$  was added. The mixture was placed in a Teflon-lined autoclave and was heated at 120 °C for 12 h. After the autoclave was cooled to room temperature, 15 mL of water and 10 g of KCl solid was added to the resultant yellow solution resulting in the formation of precipitate. The precipitate was filtered off and washed with 2 mol/L KAc and methanol. Then the collections were re-dissolved in 30 mL of hot water (90 °C). When the hot solution was cooled to room temperature, white crystals formed. A second recrystallization gave the pure product.

### Graphene oxide (GO):

Graphene oxide (GO) was synthesized following Hummers method by reacting natural graphite powder in a mixture of concentrated  $H_2SO_4$ ,  $NaNO_3$  and  $KMnO_4$ . After the reaction finished,  $H_2O_2$  was added to the reaction vessel. The GO solution was separated by centrifugation and washed twice with 1M HCl and ten-times with water. The products were dried in vacuum to give brown sheets. GO aqueous solution was prepared by ultrasonically dissolving a required amount of GO solid into deionized water.

## Characterization

UV-vis spectra were measured on a Beckman DU 800 Spectrophotometer. X-ray diffraction (XRD) patterns were obtained using a Bruker D8 ADVANCE X-ray diffractometer with Cu  $K\alpha$  radiation  $\lambda=1.5418\text{\AA}$ . Atomic force microscopy (AFM) images were recorded on a Agilent 5400 in tapping mode. X-ray photoelectron spectroscopy (XPS) measurements were performed on a Thermo ESCALAB 250 spectrometer with a monochromic X-ray source (Al  $K\alpha$ , 1486.6 eV) and the charging shift was corrected by the binding energy of C1s at 284.6eV. Raman spectra were obtained with a LabRAM HR UV-NIR Raman Microscope ( $\lambda=532\text{nm}$ ). All electrochemical experiments were carried out on a Model 660D Voltammetric Analyzer (CH Instruments, USA) in a conventional one-compartment cell with a glassy carbon electrode (GCE) with a diameter of 3mm or a Indium tin oxide (ITO) electrode with a surface area of 1cm $\times$ 2cm as working electrode, a Ag/AgCl as reference electrode and a Pt wire as

auxiliary electrode. Prior to electrochemical modification, a GCE was successively polished with 0.3 and 0.05 mm  $\alpha$ -Al<sub>2</sub>O<sub>3</sub>, and ultrasonically washed water between each experiment and dried for 5 min. ITO was cleaned firstly with acetone twice by ultrasonication and then washed with amounts of deionized water for 10min. All measurements were carried out at room temperature under nitrogen atmosphere.

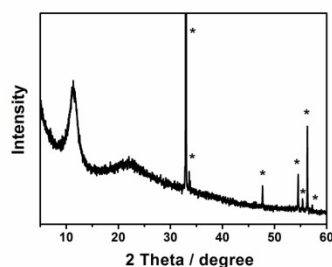

**Fig.S1** XRD patterns of reduced GO immobilized on Si slide. Diffraction peaks represented by star signals origins from Si substrate.

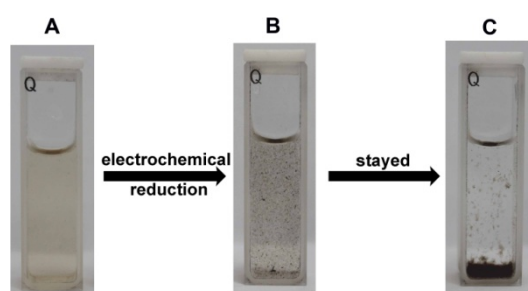

**Fig.S2** Photographs of a 0.5 mmol/L NaP<sub>5</sub>W<sub>30</sub> and 0.05 mg/ml GO aqueous solution containing 5 mmol/L HCl and 20 mmol/L NaCl (A), the solution scanned by two hundred CV cycles (B), the solution laid overnight (C).

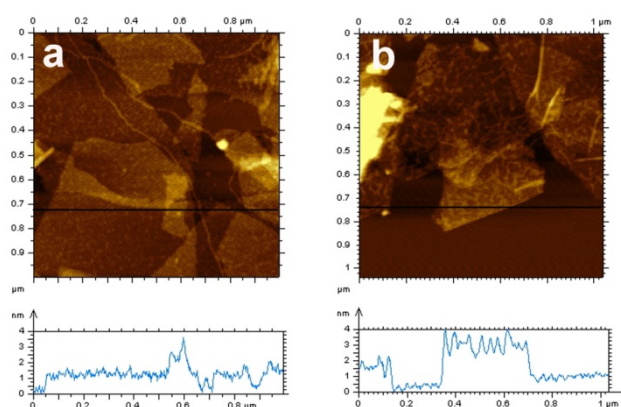

**Fig.S3** AFM images of GO (a) and RGO (b) deposited on freshly cleaved mica substrates with height profiles below.

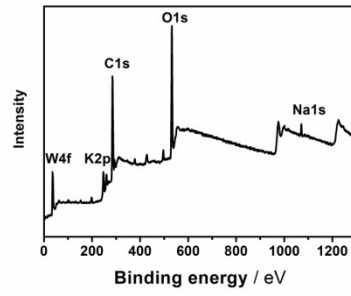

**Fig.S4** XPS spectrum of RGO showing the presence of W and K atom.

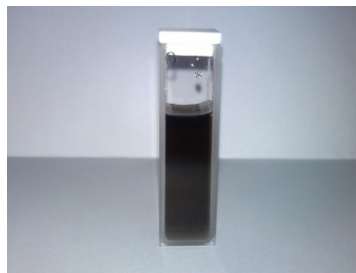

**Fig.S5** Photo of 0.5 mg/mL RGO aqueous solution.

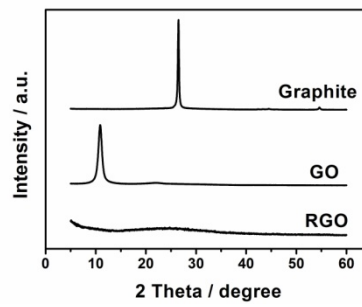

**Fig.S6** XRD patterns of graphite, GO and RGO.
